# Supplementary material for: Plasmon enhanced up-conversion nanoparticles in perovskite solar cells for effective utilization of near infrared light
Source: Royal Society of Chemistry journal article supplement (doi:10.1039/c9nr08432k), 2019-01-01
Supplement: c9nr08432k1.pdf [file c9nr08432k1.pdf]

## Electronic Supplementary Information

# Plasmon Enhanced Up-conversion Nanoparticles in Perovskite Solar Cells for Effective Utilization of Near Infrared Light

*Jiyeon Park,<sup>‡a</sup> Kihyeun Kim,<sup>‡b</sup> Eun-Jung Jo,<sup>b</sup> Woosul Kim,<sup>a</sup> Hyeonhuh Kim,<sup>a</sup> Ryeri Lee,<sup>a</sup> Jun Young Lee,<sup>a</sup> Ji Young Jo,<sup>a</sup> Min-Gon Kim,<sup>\*b</sup> and Gun Young Jung<sup>\*a</sup>*

<sup>a</sup> School of Materials Science and Engineering (SMSE), Gwangju Institute of Science and Technology (GIST), 123 Cheomdangwagi-ro, Buk-gu, Gwangju 61005, Republic of Korea.

<sup>b</sup> Department of Chemistry, Gwangju Institute of Science and Technology (GIST), 123 Cheomdangwagi-ro, Buk-gu, Gwangju 61005, Republic of Korea.

\*E-mail: gyjung@gist.ac.kr, mkim@gist.ac.kr

<sup>‡</sup>These authors equally contributed to this work.

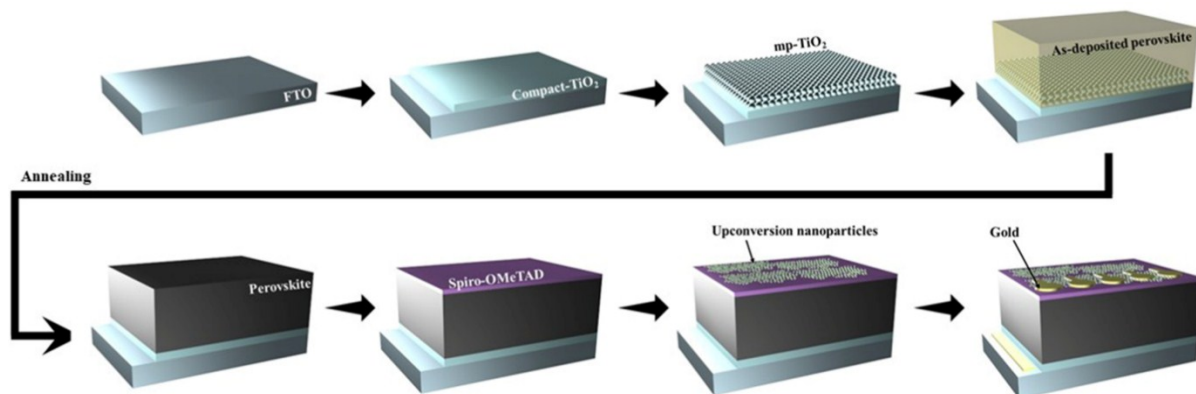

**Fig. S1.** Fabrication process of UCNPs-incorporated perovskite solar cells (PSCs). The PSCs were fabricated by using a conventional one-step process with anti-solvent method, and the UCNPs were transferred by dry transfer method. The PSC has a structure consisting of fluorine-doped tin oxide (FTO)/compact TiO<sub>2</sub> (c-TiO<sub>2</sub>)/mesoporous TiO<sub>2</sub>(mp-TiO<sub>2</sub>)/perovskite;(MAPbI<sub>3</sub>)<sub>0.85</sub>(FAPbI<sub>3</sub>)<sub>0.15</sub>/spiro-OMeTAD/UCNPs/Au.

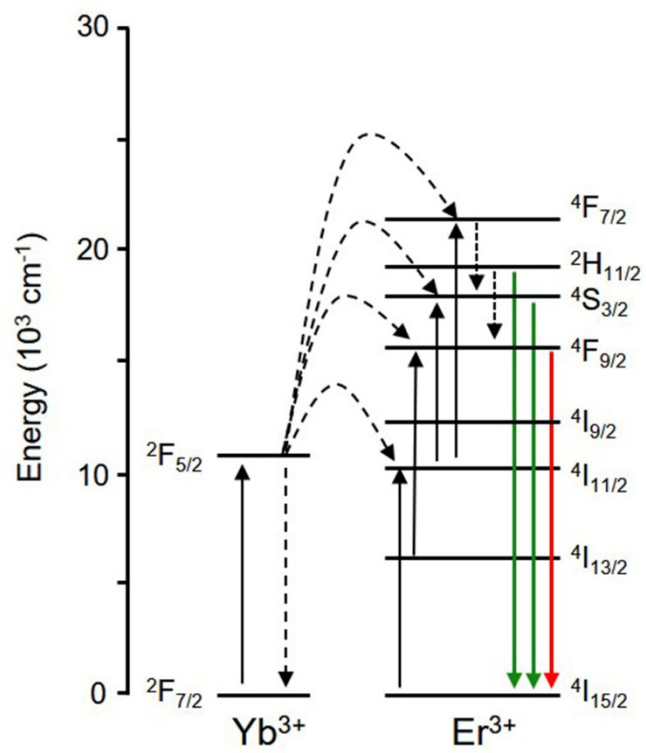

**Fig. S2.** Mechanism of the  $\text{NaYF}_4:\text{Yb}^{3+},\text{Er}^{3+}$  for up-conversion luminescence.

**(a)**

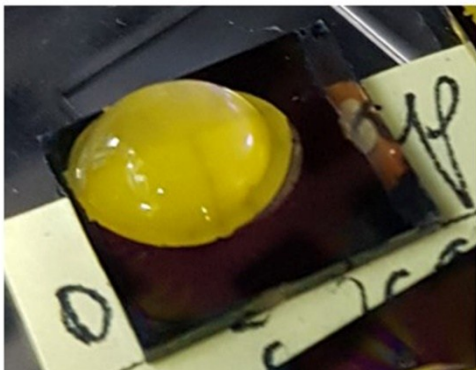

**(b)**

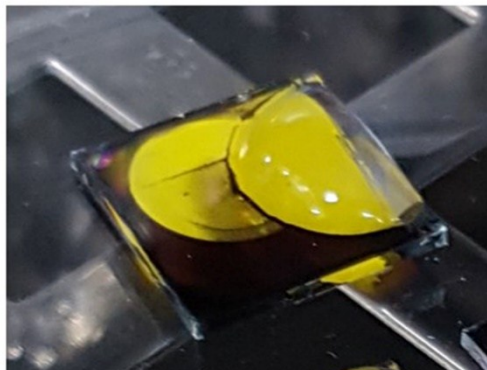

**Fig. S3.** Photographs showing the decomposed spiro-OMeTAD (HTL)/perovskite film when the UCNPs solution was dropped on the HTL: (a) color change immediately after dropping the UCNPs solution; (b) the perovskite film was rapidly decomposed along the moving trajectory of UCNPs solution.

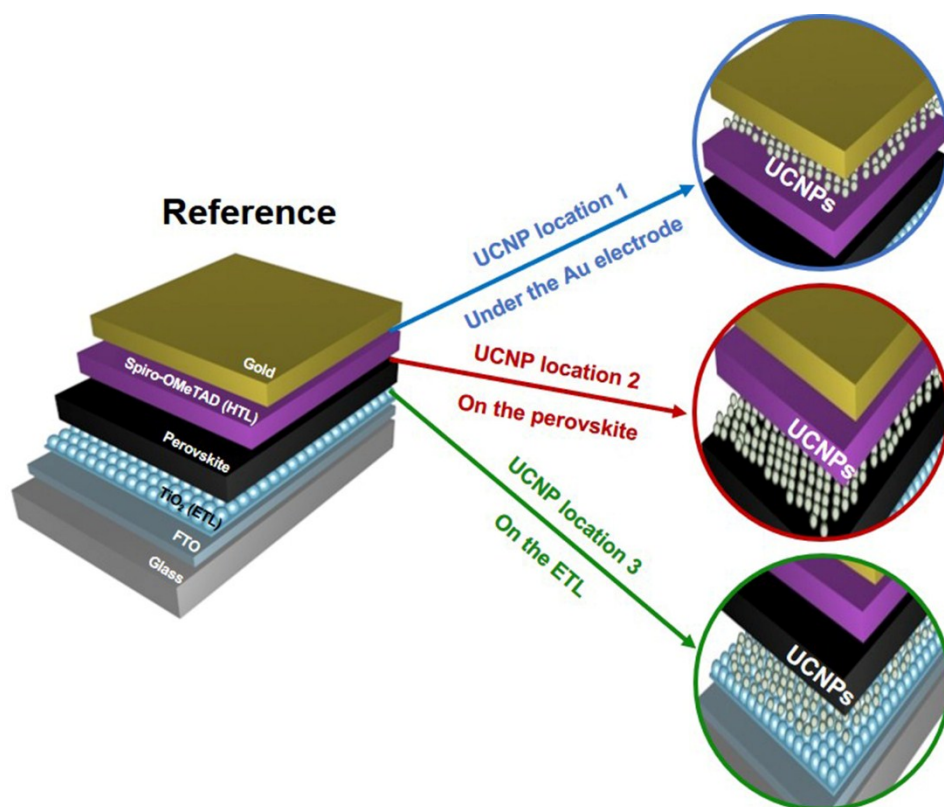

**Fig. S4.** Schematic illustration to show the transferred UCNP layers at different locations within a perovskite solar cell.

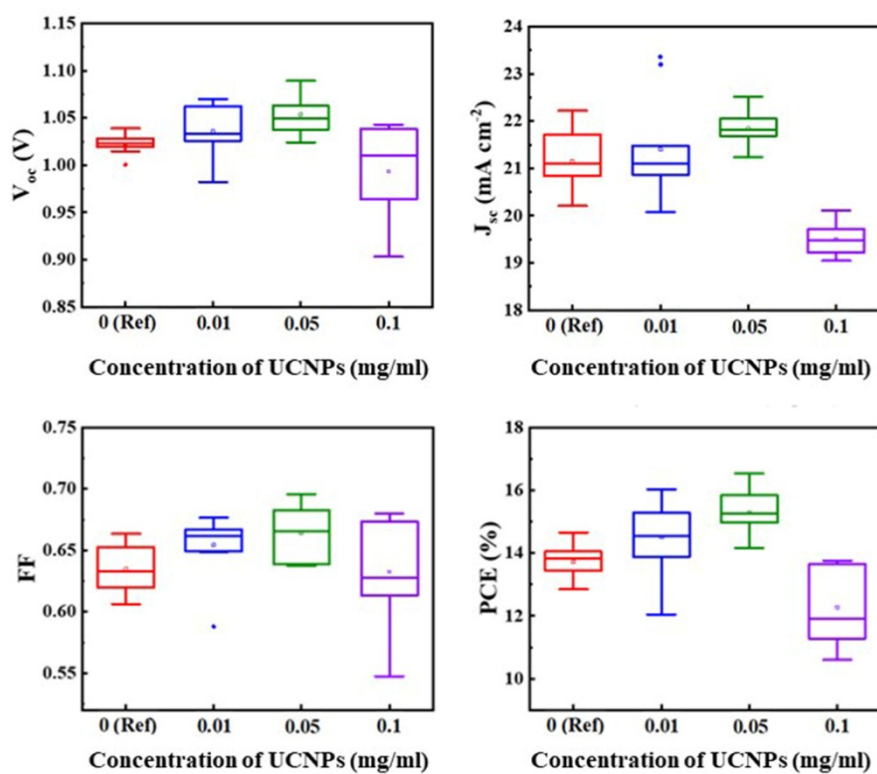

**Fig. S5.** Statistical distribution of PV parameters vs. concentration of UCNPs in solution. PV parameters of reference PSC (without UCNPs) are also included for comparison.

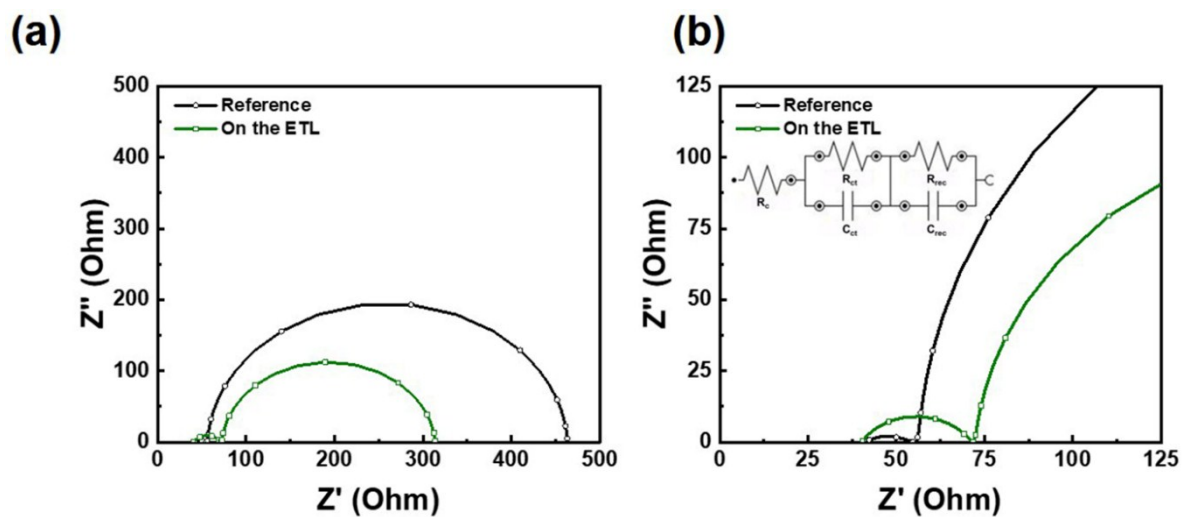

**Fig. S6.** (a) Comparison of Nyquist plots of two PSCs without UCNPs (reference) vs. with UCNPs on ETL. (b) The magnified Nyquist plots in the high-frequency region. The inset represents the equivalent circuit utilized to fit the Nyquist plot.

**Table S1.** Recombination resistance ( $R_{rec}$ ) and charge transport resistance ( $R_{ct}$ ) of PSCs obtained by fitting the Nyquist plots to the equivalent circuit.

|                                                                               | Reference | On the ETL |
|-------------------------------------------------------------------------------|-----------|------------|
| <b>Recombination resistance, <math>R_{rec}</math> (<math>\Omega</math>)</b>   | 408       | 242        |
| <b>Charge transport resistance, <math>R_{ct}</math> (<math>\Omega</math>)</b> | 19.9      | 34.4       |
